# Supplementary material
Source: publisher figshare collection journal article supplement (https://acs.figshare.com/ndownloader/files/4535755)
Supplement: Supplementary file 1 [file 4535755]

## Supporting Information

### Thermo-induced Aggregation Behavior of Poly(ethylene oxide)-b-poly(*N*-isopropylacrylamide) Block Copolymers in the Presence of Cationic Surfactants

Junpeng Zhao<sup>†,‡</sup>, Guangzhao Zhang<sup>†</sup>, Stergios Pispas<sup>‡,\*</sup>

<sup>†</sup>*Hefei National Laboratory for Physical Sciences at Microscale, University of Science and Technology of China, Hefei, Anhui, 230026 China*

<sup>‡</sup>*Theoretical and Physical Chemistry Institute, National Hellenic Research Foundation, 48 Vass. Constantinou Ave., 11635 Athens, Greece*

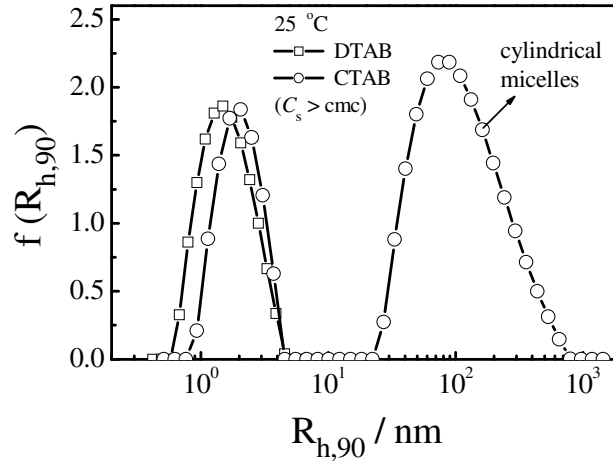

**Figure S1.** Hydrodynamic radius distributions ( $f(R_{h,90})$ ) of DTAB ( $8.0 \times 10^{-3}$  g/mL) and CTAB ( $6.0 \times 10^{-4}$  g/mL) at 25 °C, where  $C_s$  are both higher than the respective cmc value.

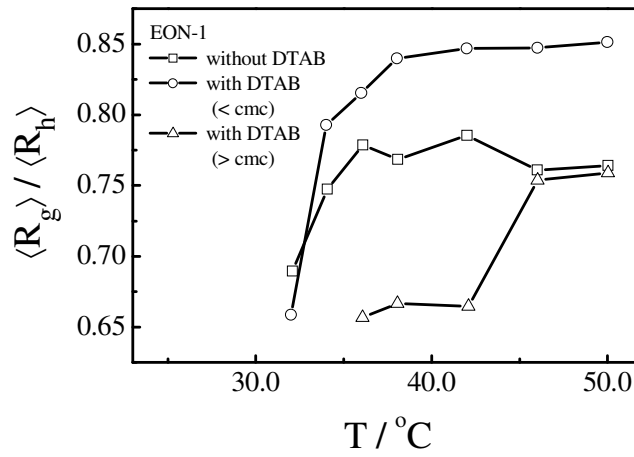

**Figure S2.** Temperature dependence of ratio of radius of gyration to hydrodynamic radius ( $\langle R_g \rangle / \langle R_h \rangle$ ) of EON-1 with and without DTAB, where  $C_p$  is constant at  $1.0 \times 10^{-3}$  g/mL,  $C_s$  are  $2.0 \times 10^{-3}$  g/mL (< cmc) and  $8.0 \times 10^{-3}$  g/mL (> cmc), respectively.

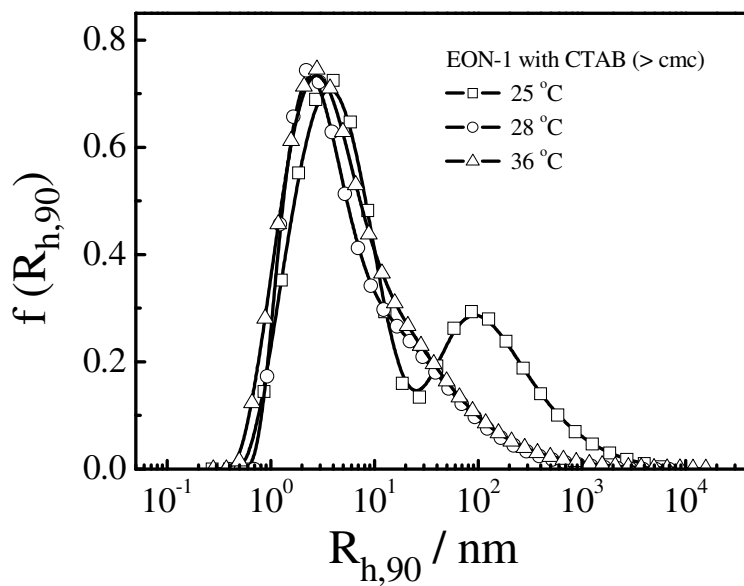

**Figure S3.** Temperature dependence of hydrodynamic radius distributions ( $f(R_{h,90})$ ) of EON-1 with CTAB, where  $C_p$  is  $1.0 \times 10^{-3}$  g/mL,  $C_s$  is  $6.0 \times 10^{-4}$  g/mL.

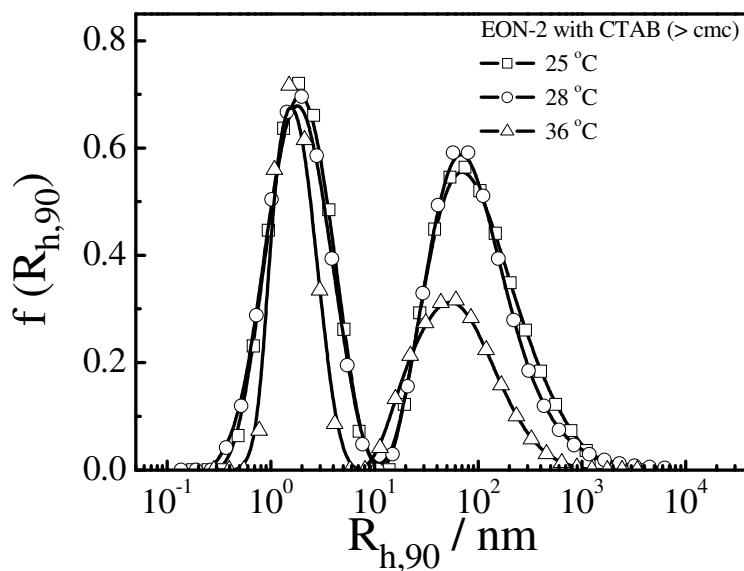

**Figure S4.** Temperature dependence of hydrodynamic radius distributions ( $f(R_{h,90})$ ) of EON-2 with CTAB, where  $C_p$  is  $1.0 \times 10^{-3}$  g/mL,  $C_s$  is  $6.0 \times 10^{-4}$  g/mL.

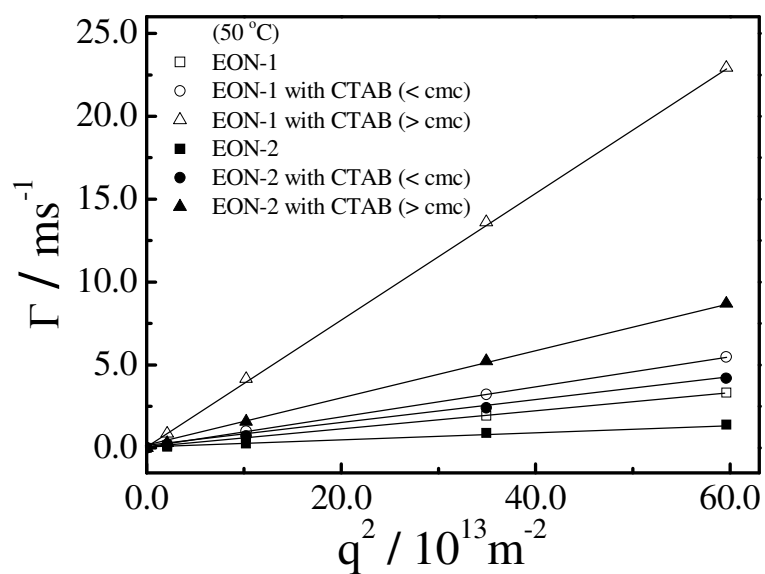

**Figure S5.** The typical scattering vector ( $q$ ) dependence of average line width ( $\Gamma$ ) of EON-1 and EON-2 (with or without CTAB) at 50 °C, where  $C_p$  is constant at  $1.0 \times 10^{-3}$  g/mL,  $C_s$  are  $6.0 \times 10^{-4}$  g/mL (< cmc) and  $1.5 \times 10^{-4}$  g/mL (> cmc).
